# Supplementary material for: Intrinsic parameters for structural variation of reverse micelles in nonionic surfactant (glycerol α-monolaurate)/oil systems: a SAXS study
Source: Royal Society of Chemistry journal article supplement (doi:10.1039/b818072e), 2009-01-01
Supplement: b818072e.pdf [file b818072e.pdf]

## Supporting information

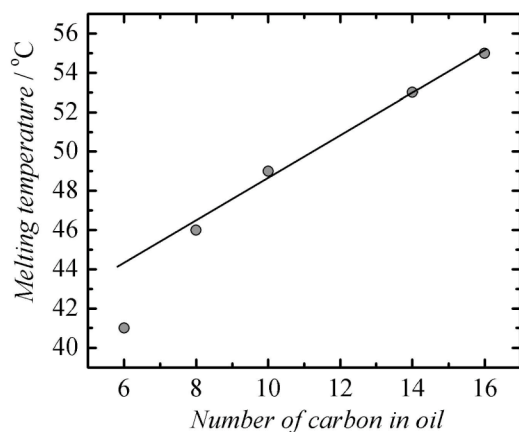

Fig. S1: Melting temperature ( $T_m$ ) of 5 wt%  $C_{12}G_1$  in different hydrocarbon oils.

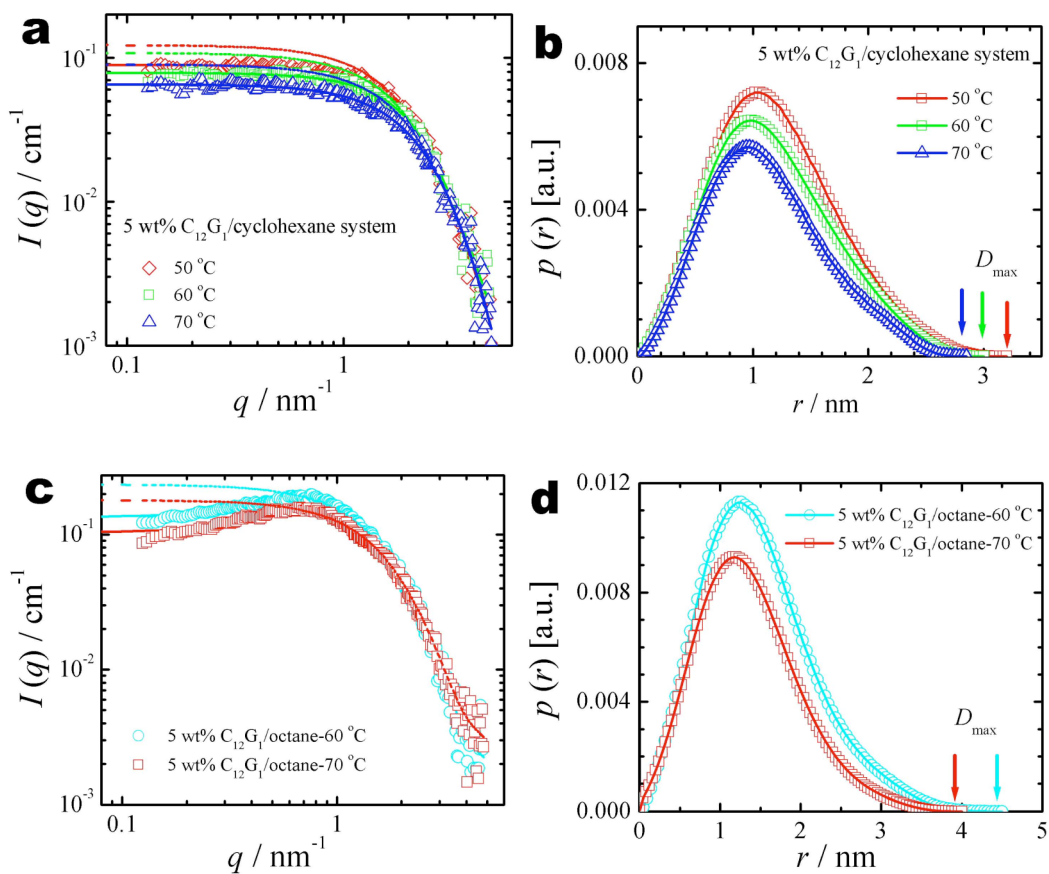

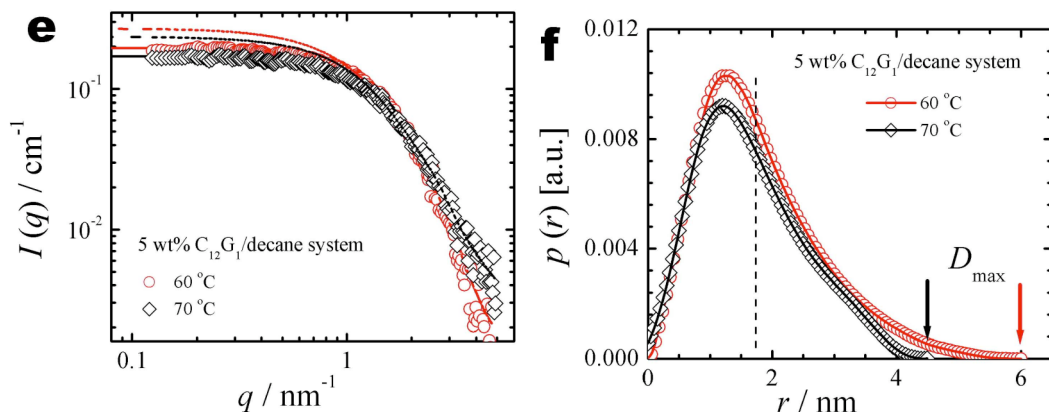

Fig. S2: Effects of temperature on the reverse micellar structures of  $\text{C}_{12}\text{G}_1$  in cyclic and straight chain hydrocarbon oils as obtained by SAXS; (a) The normalized X-ray scattering intensities,  $I(q)$ , of the 5 wt%  $\text{C}_{12}\text{G}_1$ /cyclohexane system in absolute unit at different temperatures of 50, 60, and 70 °C and (b) the corresponding real-space functions,  $p(r)$ , obtained by GIFT procedure. (c) and (d), and (e) and (f), respectively present those for the 5 wt%  $\text{C}_{12}\text{G}_1$ /octane and the 5 wt%  $\text{C}_{12}\text{G}_1$ /decane systems at 60 and 70 °C. The solid and broken lines in panel (a), (c), and (e) represent GIFT fit and the calculated form factor for  $n$  particles in unit volume, respectively. Arrows in panels (b), (d), and (f) highlight the maximum diameter,  $D_{\text{max}}$ , of the micellar core and the broken line in panel f indicates the cross section diameter of the core.

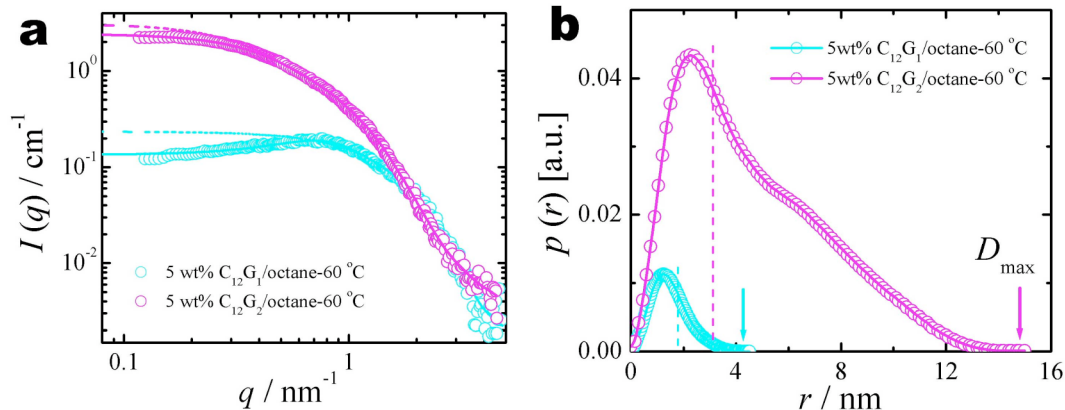

Fig. S3: Comparison of the micellar structures for different size of hydrophilic headgroup. (a) The SAXS intensities  $I(q)$  of the 5 wt%  $\text{C}_{12}\text{G}_1$ /octane and 5 wt%  $\text{C}_{12}\text{G}_2$ /octane systems obtained in absolute unit at 60 °C and (b) the corresponding pair-distance distribution functions,  $p(r)$ .
